# Supplementary material for: Effects of auriculotherapy for postoperative nausea and vomiting: A systematic review protocol
Source: Research Square preprint supplement (doi:10.21203/rs.3.rs-1090857/v1), 2021-11-23
Supplement: Supplementary file 1 [file 1a231b1ef04d1a8f091ff2ca.pdf]

## Systematic review

### 1. \* Review title.

Give the title of the review in English

Effects of auricular acupuncture for postoperative nausea and vomiting: a systematic review

### 2. Original language title.

For reviews in languages other than English, give the title in the original language. This will be displayed with the English language title.

### 3. \* Anticipated or actual start date.

Give the date the systematic review started or is expected to start.

22/06/2019

### 4. \* Anticipated completion date.

Give the date by which the review is expected to be completed.

02/11/2019

### 5. \* Stage of review at time of this submission.

Tick the boxes to show which review tasks have been started and which have been completed. Update this field each time any amendments are made to a published record.

**Reviews that have started data extraction (at the time of initial submission) are not eligible for inclusion in PROSPERO.** If there is later evidence that incorrect status and/or completion date has been supplied, the published PROSPERO record will be marked as retracted.

This field uses answers to initial screening questions. It cannot be edited until after registration.

The review has not yet started: No

| Review stage                                                    | Started | Completed |
|-----------------------------------------------------------------|---------|-----------|
| Preliminary searches                                            | Yes     | Yes       |
| Piloting of the study selection process                         | Yes     | No        |
| Formal screening of search results against eligibility criteria | Yes     | Yes       |
| Data extraction                                                 | No      | No        |
| Risk of bias (quality) assessment                               | No      | No        |
| Data analysis                                                   | No      | No        |

## PROSPERO

### International prospective register of systematic reviews

Provide any other relevant information about the stage of the review here.

#### 6. \* Named contact.

The named contact is the guarantor for the accuracy of the information in the register record. This may be any member of the review team.

Isabella Boechat Faria Santos

**Email salutation (e.g. "Dr Smith" or "Joanne") for correspondence:**

Miss Isabella Santos

#### 7. \* Named contact email.

Give the electronic email address of the named contact.

isabella.boechatfs@gmail.com

#### 8. Named contact address

Give the full institutional/organisational postal address for the named contact.

Universidade Federal do Pará - UFPA - Guamá, Belém - PA, 66075-110

#### 9. Named contact phone number.

Give the telephone number for the named contact, including international dialling code.

+55 91 99633-8661

#### 10. \* Organisational affiliation of the review.

Full title of the organisational affiliations for this review and website address if available. This field may be completed as 'None' if the review is not affiliated to any organisation.

Universidade Federal do Pará

**Organisation web address:**

#### 11. \* Review team members and their organisational affiliations.

Give the personal details and the organisational affiliations of each member of the review team. Affiliation refers to groups or organisations to which review team members belong. **NOTE: email and country now MUST be entered for each person, unless you are amending a published record.**

Miss Isabella Santos. Universidade Federal do Pará  
Dr João de Melo Neto. Universidade Federal do Pará  
Miss Cleuma Soares. Universidade Federal do Pará  
Miss Edila Andrade. Universidade Federal do Pará  
Miss Giovana Melo. Universidade Federal do Pará  
Mr Lúcio Flávio Rodrigues. Universidade Federal do Pará  
Miss Amanda Silva. Universidade Federal do Pará  
Mr Dionata Costa. Universidade Federal do Pará  
Mr Diego Dantas. Universidade Federal do Pará  
Miss Thalia Mendonça. Universidade Federal do Pará

## 12. \* Funding sources/sponsors.

Details of the individuals, organizations, groups, companies or other legal entities who have funded or sponsored the review.

Dr. João Simão de Melo Neto and Universidade Federal do Pará

## Grant number(s)

State the funder, grant or award number and the date of award

## 13. \* Conflicts of interest.

List actual or perceived conflicts of interest (financial or academic).

None

## 14. Collaborators.

Give the name and affiliation of any individuals or organisations who are working on the review but who are not listed as review team members. **NOTE: email and country must be completed for each person, unless you are amending a published record.**

## 15. \* Review question.

State the review question(s) clearly and precisely. It may be appropriate to break very broad questions down into a series of related more specific questions. Questions may be framed or refined using PI(E)COS or similar where relevant.

What is the effect of auricular acupuncture on PONV control?

## 16. \* Searches.

State the sources that will be searched (e.g. Medline). Give the search dates, and any restrictions (e.g. language or publication date). Do NOT enter the full search strategy (it may be provided as a link or attachment below.)

Literatures from all years of publication were included and the chosen databases were PubMed, BIREME and PEDro. Studies with languages ??other than English, Spanish and Portuguese were excluded.

## 17. URL to search strategy.

Upload a file with your search strategy, or an example of a search strategy for a specific database, (including the keywords) in pdf or word format. In doing so you are consenting to the file being made publicly accessible. Or provide a URL or link to the strategy. Do NOT provide links to your search **results**.

[https://www.crd.york.ac.uk/PROSPEROFILES/149772\\_STRATEGY\\_20190910.pdf](https://www.crd.york.ac.uk/PROSPEROFILES/149772_STRATEGY_20190910.pdf)

Alternatively, upload your search strategy to CRD in pdf format. Please note that by doing so you are consenting to the file being made publicly accessible.

Do not make this file publicly available until the review is complete

## 18. \* Condition or domain being studied.

Give a short description of the disease, condition or healthcare domain being studied in your systematic review.

Um dispositivo, caracterizado por vôos e vôos, é um dos principais efeitos no pós-operatório de intervenções cirúrgicas com anestesia.

### 19. \* Participants/population.

Specify the participants or populations being studied in the review. The preferred format includes details of both inclusion and exclusion criteria.

Early postoperative anesthetic patients who experienced vomiting (nausea and vomiting) were included in this systematic review.

### 20. \* Intervention(s), exposure(s).

Give full and clear descriptions or definitions of the interventions or the exposures to be reviewed. The preferred format includes details of both inclusion and exclusion criteria.

Studies that used acupuncture in ear acupoint as a contributor to the reduction or control of emesis in patients who underwent surgical intervention were analyzed. Applications of the following types will be considered: transcutaneous electrical nerve stimulation (TENS), needles, seeds / pellets and laser electrostimulation.

### 21. \* Comparator(s)/control.

Where relevant, give details of the alternatives against which the intervention/exposure will be compared (e.g. another intervention or a non-exposed control group). The preferred format includes details of both inclusion and exclusion criteria.

Only studies that performed the comparison of an experimental group with a control group, placebo or other interventions were included.

### 22. \* Types of study to be included.

Give details of the study designs (e.g. RCT) that are eligible for inclusion in the review. The preferred format includes both inclusion and exclusion criteria. If there are no restrictions on the types of study, this should be stated.

The initial selection occurred to exclude studies that did not address a theme. The inclusion criteria were the articles being related to the descriptors. Studies were excluded: animal experiment, idiom of topic reports (different than English, Spanish and Portuguese); Record encountered repeatedly; Evaluate hosting Report/Case series. After screening for titles and abstracts, the articles were evaluated in full text for eligibility.

### 23. Context.

Give summary details of the setting or other relevant characteristics, which help define the inclusion or exclusion criteria.

### 24. \* Main outcome(s).

Give the pre-specified main (most important) outcomes of the review, including details of how the outcome is defined and measured and when these measurement are made, if these are part of the review inclusion criteria.

Nausea, vomit and emesis were considered as primary outcomes regarding the regularity and severity of the occurrence of these symptoms after surgical procedure.

## PROSPERO

### International prospective register of systematic reviews

#### Measures of effect

Please specify the effect measure(s) for you main outcome(s) e.g. relative risks, odds ratios, risk difference, and/or 'number needed to treat.

Number of episodes and time (in hours) to first occurrence

#### 25. \* Additional outcome(s).

List the pre-specified additional outcomes of the review, with a similar level of detail to that required for main outcomes. Where there are no additional outcomes please state 'None' or 'Not applicable' as appropriate to the review

Type of anesthetic and type of surgery were considered as additional outcomes.

#### Measures of effect

Please specify the effect measure(s) for you additional outcome(s) e.g. relative risks, odds ratios, risk difference, and/or 'number needed to treat.

Amount of anesthetic administered and duration of anesthesia (in hours)

#### 26. \* Data extraction (selection and coding).

Describe how studies will be selected for inclusion. State what data will be extracted or obtained. State how this will be done and recorded.

Previously defined criteria according to PICOS Anagram (population, intervention, comparison, outcome, and type of study). Will be done and recorded the dispersion measure and measure of central tendency for nausea and vomiting

#### 27. \* Risk of bias (quality) assessment.

State which characteristics of the studies will be assessed and/or any formal risk of bias/quality assessment tools that will be used.

The qualification of the methodology used in the research was analyzed by the PEDro scale.

#### 28. \* Strategy for data synthesis.

Describe the methods you plan to use to synthesise data. This **must not be generic text** but should be **specific to your review** and describe how the proposed approach will be applied to your data. If meta-analysis is planned, describe the models to be used, methods to explore statistical heterogeneity, and software package to be used.

A qualitative narrative synthesis will be performed. At least five studies will be used. The analyzed data will be the occurrence of nausea, vomiting and emesis in the postoperative period after the application of auriculotherapy, with analysis of association between groups, of relative and absolute frequency. Criteria previously defined according to the anagram of PICOS (population, intervention, comparison, result and type of study). A table will be drawn up with the description of the association of nausea, vomiting and emesis in relation to auriculotherapy in the analyzed authors, showing a positive effect, absent or not analyzed.

#### 29. \* Analysis of subgroups or subsets.

State any planned investigation of 'subgroups'. Be clear and specific about which type of study or participant will be included in each group or covariate investigated. State the planned analytic approach.

Comparison of an experimental group with a control group, placebo or other interventions were included.

### 30. \* Type and method of review.

Select the type of review, review method and health area from the lists below.

#### Type of review

Cost effectiveness

No

Diagnostic

No

Epidemiologic

No

Individual patient data (IPD) meta-analysis

No

Intervention

No

Living systematic review

No

Meta-analysis

No

Methodology

No

Narrative synthesis

No

Network meta-analysis

No

Pre-clinical

No

Prevention

No

Prognostic

No

Prospective meta-analysis (PMA)

No

Review of reviews

No

Service delivery

No

Synthesis of qualitative studies

No

Systematic review

Yes

Other

No

**Health area of the review**

Alcohol/substance misuse/abuse

No

Blood and immune system

No

Cancer

No

Cardiovascular

No

Care of the elderly

No

Child health

No

Complementary therapies

Yes

COVID-19

No

Crime and justice

No

Dental

No

Digestive system

No

Ear, nose and throat

No

Education

No

Endocrine and metabolic disorders

No

Eye disorders

No

General interest

No

Genetics

No

Health inequalities/health equity

No

Infections and infestations

No

International development

No

**PROSPERO****International prospective register of systematic reviews**

Mental health and behavioural conditions

No

Musculoskeletal

No

Neurological

No

Nursing

No

Obstetrics and gynaecology

No

Oral health

No

Palliative care

No

Perioperative care

No

Physiotherapy

Yes

Pregnancy and childbirth

No

Public health (including social determinants of health)

No

Rehabilitation

No

Respiratory disorders

No

Service delivery

No

Skin disorders

No

Social care

No

Surgery

No

Tropical Medicine

No

Urological

No

Wounds, injuries and accidents

No

Violence and abuse

No

### 31. Language.

Select each language individually to add it to the list below, use the bin icon to remove any added in error.

English

There is not an English language summary

### 32. \* Country.

Select the country in which the review is being carried out. For multi-national collaborations select all the countries involved.

Brazil

### 33. Other registration details.

Name any other organisation where the systematic review title or protocol is registered (e.g. Campbell, or The Joanna Briggs Institute) together with any unique identification number assigned by them. If extracted data will be stored and made available through a repository such as the Systematic Review Data Repository (SRDR), details and a link should be included here. If none, leave blank.

### 34. Reference and/or URL for published protocol.

If the protocol for this review is published provide details (authors, title and journal details, preferably in Vancouver format)

Add web link to the published protocol.

Or, upload your published protocol here in pdf format. Note that the upload will be publicly accessible.

**No I do not make this file publicly available until the review is complete**

Please note that the information required in the PROSPERO registration form must be completed in full even if access to a protocol is given.

### 35. Dissemination plans.

Do you intend to publish the review on completion?

Yes

Give brief details of plans for communicating review findings.?

### 36. Keywords.

Give words or phrases that best describe the review. Separate keywords with a semicolon or new line. Keywords help PROSPERO users find your review (keywords do not appear in the public record but are included in searches). Be as specific and precise as possible. Avoid acronyms and abbreviations unless these are in wide use.

Antiemetics; Surgery; Acupuncture; Ear.

### 37. Details of any existing review of the same topic by the same authors.

If you are registering an update of an existing review give details of the earlier versions and include a full bibliographic reference, if available.

### 38. \* Current review status.

Update review status when the review is completed and when it is published. New registrations must be

**PROSPERO**  
**International prospective register of systematic reviews**

ongoing so this field is not editable for initial submission.

Please provide anticipated publication date

Review\_Ongoing

**39. Any additional information.**

Provide any other information relevant to the registration of this review.

This review will assess secondary outcomes, assessing the type of anesthetic and the type of surgery.

**40. Details of final report/publication(s) or preprints if available.**

Leave empty until publication details are available OR you have a link to a preprint (NOTE: this field is not editable for initial submission). List authors, title and journal details preferably in Vancouver format.

Give the link to the published review or preprint.
